# Supplementary material
Source: publisher figshare collection journal article supplement (https://wiley.figshare.com/articles/dataset/_/3560229)
Supplement: Supplementary file 1 [file 1 › appendix-D.htm]

Ecological Archives E095-219-A4


*Ecological Archives* E095-219-A4

Jurgis Sapijanskas, Alain Paquette, Catherine Potvin, Norbert Kunert, Michel Loreau. 2014. Tropical tree diversity enhances light capture through crown plasticity and spatial and temporal niche differences. *Ecology* 95:2479–2492. http://dx.doi.org/10.1890/13-1366.1

Appendix D. Supplementary methods and results for the stratified bootstrap tests.

> View / download PDF.


---

[Back to E095-219]
